# Supplementary material
Source: PubMed Central journal article supplement (PMC8976759)
Supplement: NIHMS1786113-supplement-319929_Major_Resources_Table.pdf [file NIHMS1786113-supplement-319929_Major_Resources_Table.pdf]

## Major Resources Table

In order to allow validation and replication of experiments, all essential research materials listed in the Methods should be included in the Major Resources Table below. Authors are encouraged to use public repositories for protocols, data, code, and other materials and provide persistent identifiers and/or links to repositories when available. Authors may add or delete rows as needed.

### Animals (in vivo studies)

| Species   | Vendor or Source           | Background Strain                                                     | Persistent ID / URL   |
|-----------|----------------------------|-----------------------------------------------------------------------|-----------------------|
| Zebrafish | Matsuoka et al., 2016      | <i>Tg(hsp70l:slft4)<sup>bns82</sup></i>                               | ZFIN: <i>bns82Tg</i>  |
| Zebrafish | Rossi et al., 2016         | <i>Tg(hsp70l:vegfaa121-F17A)<sup>bns100</sup></i>                     | ZFIN: <i>bns100Tg</i> |
| Zebrafish | Bussmann et al., 2010      | <i>Tg(-0.8flt1:RFP)<sup>hu5333</sup></i>                              | ZFIN: <i>hu5333Tg</i> |
| Zebrafish | Chi et al., 2008           | <i>Tg(myf7:DsRed)<sup>s879</sup></i>                                  | ZFIN: <i>s879Tg</i>   |
| Zebrafish | Wang et al., 2015          | <i>TgBAC(tcf21:NTR-mCherry)<sup>pd108</sup></i>                       | ZFIN: <i>pd108Tg</i>  |
| Zebrafish | Kikuchi et al., 2011       | <i>TgBAC(tcf21:CreERT2)<sup>pd42</sup></i>                            | ZFIN: <i>pd42Tg</i>   |
| Zebrafish | Okuda et al., 2012         | <i>Tg(-5.2lyve1b:DsRed)<sup>nz101</sup></i>                           | ZFIN: <i>nz101Tg</i>  |
| Zebrafish | Nicenboim et al., 2015     | <i>Tg(flt1:Mmu.Fos-GFP)<sup>wz2</sup></i>                             | ZFIN: <i>wz2Tg</i>    |
| Zebrafish | Le Guen et al., 2014       | <i>vegfc<sup>hu5055</sup></i>                                         | ZFIN: <i>hu5055</i>   |
| Zebrafish | Gancz et al., 2019         | <i>vegfd<sup>bns257</sup></i>                                         | ZFIN: <i>bns257</i>   |
| Zebrafish | Kettleborough et al., 2013 | <i>cxcr1<sup>sa14414</sup></i>                                        | ZFIN: <i>sa14414</i>  |
| Zebrafish | This paper                 | <i>Tg(hsp70l:emilin2a, cryaa:CFP)<sup>bns504</sup></i>                | <i>bns504</i>         |
| Zebrafish | This paper                 | <i>Tg(hsp70l:loxP-CFP-loxP-emilin2a-p2A-mCherry)<sup>bns510</sup></i> | <i>bns510</i>         |
| Zebrafish | This paper                 | <i>emilin2a<sup>bns556</sup></i>                                      | <i>bns556</i>         |
| Zebrafish | This paper                 | <i>cxcl8a<sup>vu660</sup></i>                                         | <i>vu660</i>          |

### Genetically Modified Animals

|                 | Species | Vendor or Source | Background Strain | Other Information | Persistent ID / URL |
|-----------------|---------|------------------|-------------------|-------------------|---------------------|
| Parent - Male   |         |                  |                   |                   |                     |
| Parent - Female |         |                  |                   |                   |                     |

### Antibodies

| Target antigen      | Vendor or Source | Catalog # | Working concentration | Lot # (preferred but not required) | Persistent ID / URL                                                                                                                                                       |
|---------------------|------------------|-----------|-----------------------|------------------------------------|---------------------------------------------------------------------------------------------------------------------------------------------------------------------------|
| MEF2 (discontinued) | Santa Cruz       | sc-313    | 1:200 (IF)            |                                    | <a href="https://www.scbt.com/p/mef-2-antibody-c-21">https://www.scbt.com/p/mef-2-antibody-c-21</a>                                                                       |
| PCNA                | Santa Cruz       | sc-56     | 1:500 (IF)            |                                    | <a href="https://www.scbt.com/p/pcna-antibody-pc10?requestFrom=search">https://www.scbt.com/p/pcna-antibody-pc10?requestFrom=search</a>                                   |
| embMHC (N2.261)     | DSHB             | N2.261    | 1:20 (IF)             |                                    | <a href="https://dshb.biology.uiowa.edu/N2-261">https://dshb.biology.uiowa.edu/N2-261</a>                                                                                 |
| GFP                 | Aves Labs        | GFP-1010  | 1:500 (IF)            |                                    | <a href="https://www.aveslabs.com/products/anti-green-fluorescent-protein-antibody-gfp">https://www.aveslabs.com/products/anti-green-fluorescent-protein-antibody-gfp</a> |

|                                             |                          |             |              |  |                                                                                                                                                                                                                                                                                   |
|---------------------------------------------|--------------------------|-------------|--------------|--|-----------------------------------------------------------------------------------------------------------------------------------------------------------------------------------------------------------------------------------------------------------------------------------|
| RFP                                         | Rockland                 | 600-401-379 | 1:200 (IF)   |  | <a href="https://www.rockland.com/categories/primary-antibodies/rfp-antibody-pre-adsorbed-600-401-379/">https://www.rockland.com/categories/primary-antibodies/rfp-antibody-pre-adsorbed-600-401-379/</a>                                                                         |
| Fli1a                                       | abcam                    | ab133485    | 1:100 (IF)   |  | <a href="https://www.abcam.com/fli1-antibody-epr4646-ab133485.html">https://www.abcam.com/fli1-antibody-epr4646-ab133485.html</a>                                                                                                                                                 |
| Alexa Fluor 488 Goat Anti-chicken IgG (H+L) | Thermo Fisher Scientific | A-11039     | 1:500 (IF)   |  | <a href="https://www.thermofisher.com/antibody/product/Goat-anti-Chicken-IgY-H-L-Secondary-Antibody-Polyclonal/A-11039">https://www.thermofisher.com/antibody/product/Goat-anti-Chicken-IgY-H-L-Secondary-Antibody-Polyclonal/A-11039</a>                                         |
| Alexa Fluor 488 Goat Anti-mouse IgG (H+L)   | Thermo Fisher Scientific | A-11029     | 1:500 (IF)   |  | <a href="https://www.thermofisher.com/antibody/product/Goat-anti-Mouse-IgG-H-L-Highly-Cross-Adsorbed-Secondary-Antibody-Polyclonal/A-11029">https://www.thermofisher.com/antibody/product/Goat-anti-Mouse-IgG-H-L-Highly-Cross-Adsorbed-Secondary-Antibody-Polyclonal/A-11029</a> |
| Alexa Fluor 568 Goat Anti-mouse IgG (H+L)   | Thermo Fisher Scientific | A-11004     | 1:500 (IF)   |  | <a href="https://www.thermofisher.com/antibody/product/Goat-anti-Mouse-IgG-H-L-Cross-Adsorbed-Secondary-Antibody-Polyclonal/A-11004">https://www.thermofisher.com/antibody/product/Goat-anti-Mouse-IgG-H-L-Cross-Adsorbed-Secondary-Antibody-Polyclonal/A-11004</a>               |
| Alexa Fluor 647 Goat Anti-rabbit IgG (H+L)  | Thermo Fisher Scientific | A-21244     | 1:500 (IF)   |  | <a href="https://www.thermofisher.com/antibody/product/Goat-anti-Rabbit-IgG-H-L-Cross-Adsorbed-Secondary-Antibody-Polyclonal/A-21244">https://www.thermofisher.com/antibody/product/Goat-anti-Rabbit-IgG-H-L-Cross-Adsorbed-Secondary-Antibody-Polyclonal/A-21244</a>             |
| DIG-AP                                      | Roche                    | 11093274910 | 1:1000 (ISH) |  | <a href="https://www.sigmaaldrich.com/DE/de/product/roche/11093274910">https://www.sigmaaldrich.com/DE/de/product/roche/11093274910</a>                                                                                                                                           |

IF: immunofluorescent staining; ISH: in situ hybridization

#### DNA/cDNA Clones

| Clone Name                                                  | Sequence                               | Source / Repository | Persistent ID / URL                                                         |
|-------------------------------------------------------------|----------------------------------------|---------------------|-----------------------------------------------------------------------------|
| <i>pIsce_hsp70l_emilin2a_cryaa_CFP</i>                      | included in the Supplemental Materials | This paper          |                                                                             |
| <i>pTol2_hsp70l_loxP_CFP-STOP_loxP_emilin2a_p2A_mCherry</i> | included in the Supplemental Materials | This paper          |                                                                             |
| <i>pCS2+_vegfc</i>                                          | included in the Supplemental Materials | This paper          |                                                                             |
| pT3TS-nCas9n                                                |                                        | Addgene Cat# 46757  | <a href="https://www.addgene.org/46757/">https://www.addgene.org/46757/</a> |
| pCMV-Tol2                                                   |                                        | Addgene Cat# 31823  | <a href="https://www.addgene.org/31823/">https://www.addgene.org/31823/</a> |

## Cultured Cells

| Name                                            | Vendor or Source        | Sex (F, M, or unknown) | Persistent ID / URL                                                                                                                                                                                                                                                                                                                                     |
|-------------------------------------------------|-------------------------|------------------------|---------------------------------------------------------------------------------------------------------------------------------------------------------------------------------------------------------------------------------------------------------------------------------------------------------------------------------------------------------|
| Human Umbilical Vein Endothelial Cells (HUVECs) | Lonza Catalog #: C2519A | N/A                    | <a href="https://bioscience.lonza.com/lonza_bs/DE/en/Primary-and-Stem-Cells/p/000000000000184665/HUVEC-%E2%80%93-Human-Umbilical-Vein-Endothelial-Cells%2C-Pooled%2C-in-EGM-2">https://bioscience.lonza.com/lonza_bs/DE/en/Primary-and-Stem-Cells/p/000000000000184665/HUVEC-%E2%80%93-Human-Umbilical-Vein-Endothelial-Cells%2C-Pooled%2C-in-EGM-2</a> |

## Data & Code Availability

| Description                          | Source / Repository     | Persistent ID / URL |
|--------------------------------------|-------------------------|---------------------|
| RNAseq WT vs <i>Tg(hsp70l:sflt4)</i> | Gene Expression Omnibus | GSE168175           |

## Other

| Description                                | Source / Repository       | Persistent ID / URL                                                                                                                                                                                                                                                                                                                                                                                                                                                                                                                                                                                                                                                                                                                                                                                           |
|--------------------------------------------|---------------------------|---------------------------------------------------------------------------------------------------------------------------------------------------------------------------------------------------------------------------------------------------------------------------------------------------------------------------------------------------------------------------------------------------------------------------------------------------------------------------------------------------------------------------------------------------------------------------------------------------------------------------------------------------------------------------------------------------------------------------------------------------------------------------------------------------------------|
| Qtracker™705 Vascular labels               | Thermo Fisher Scientific  | <a href="https://www.thermofisher.com/order/catalog/product/Q21061MP">https://www.thermofisher.com/order/catalog/product/Q21061MP</a>                                                                                                                                                                                                                                                                                                                                                                                                                                                                                                                                                                                                                                                                         |
| Acid Fuchsin Orange G (AFOG) kit           | BioGnost                  | <a href="https://www.biognost.com/product/a-f-o-g-kit/">https://www.biognost.com/product/a-f-o-g-kit/</a>                                                                                                                                                                                                                                                                                                                                                                                                                                                                                                                                                                                                                                                                                                     |
| BMPurple                                   | Roche                     | <a href="https://www.sigmaaldrich.com/DE/de/product/roche/11442074001">https://www.sigmaaldrich.com/DE/de/product/roche/11442074001</a>                                                                                                                                                                                                                                                                                                                                                                                                                                                                                                                                                                                                                                                                       |
| Pierce Primary Cardiomyocyte Isolation Kit | Thermo Fisher Scientific  | <a href="https://www.thermofisher.com/order/catalog/product/88281">https://www.thermofisher.com/order/catalog/product/88281</a>                                                                                                                                                                                                                                                                                                                                                                                                                                                                                                                                                                                                                                                                               |
| DAPI                                       | Sigma                     | <a href="https://www.sigmaaldrich.com/DE/de/product/sigma/d9542">https://www.sigmaaldrich.com/DE/de/product/sigma/d9542</a>                                                                                                                                                                                                                                                                                                                                                                                                                                                                                                                                                                                                                                                                                   |
| RNA clean and concentrator extraction kit  | Zymo                      | <a href="https://www.zymoresearch.de/collections/rna-clean-concentrator-kits-rcc">https://www.zymoresearch.de/collections/rna-clean-concentrator-kits-rcc</a>                                                                                                                                                                                                                                                                                                                                                                                                                                                                                                                                                                                                                                                 |
| Maxima first strand cDNA synthesis kit     | Thermo Fisher Scientific  | <a href="https://www.thermofisher.com/order/catalog/product/K1641">https://www.thermofisher.com/order/catalog/product/K1641</a>                                                                                                                                                                                                                                                                                                                                                                                                                                                                                                                                                                                                                                                                               |
| DyNAmo Flash SYBR Green qPCR Kit           | Thermos Fisher Scientific | <a href="https://www.thermofisher.com/order/catalog/product/F415S">https://www.thermofisher.com/order/catalog/product/F415S</a>                                                                                                                                                                                                                                                                                                                                                                                                                                                                                                                                                                                                                                                                               |
| PrimeStar Max DNA Polymerase               | Takara                    | <a href="https://www.takarabio.com/products/pcr/high-fidelity-pcr/primestar-max-dna-polymerase">https://www.takarabio.com/products/pcr/high-fidelity-pcr/primestar-max-dna-polymerase</a>                                                                                                                                                                                                                                                                                                                                                                                                                                                                                                                                                                                                                     |
| siVEGFC                                    | Mission esiRNA, Sigma     | <a href="https://www.sigmaaldrich.com/DE/de/product/sigma/ehu013781">https://www.sigmaaldrich.com/DE/de/product/sigma/ehu013781</a>                                                                                                                                                                                                                                                                                                                                                                                                                                                                                                                                                                                                                                                                           |
| Lipofectamine RNAiMAX                      | Invitrogen                | <a href="https://www.thermofisher.com/de/de/home/brands/product-brand/lipofectamine/lipofectamine-rnaimx.html?gclid=Cj0KCQiAosmPBhCPARIsAHOen-MJQWnnwz86bQV8Ulf2kL-37twuYrcdpZ7ksT_MxDf6mpGiiNL7G7QaAhmiEALw_wcB&amp;ef_id=Cj0KCQiAosmPBhCPARIsAHOen-MJQWnnwz86bQV8Ulf2kL-37twuYrcdpZ7ksT_MxDf6mpGiiNL7G7QaAhmiEALw_wcB:G:s&amp;s_kwcid=AL!3652!3!552917619244!p!!g!!lipofectamine%20rnaimax&amp;cid=bid">https://www.thermofisher.com/de/de/home/brands/product-brand/lipofectamine/lipofectamine-rnaimx.html?gclid=Cj0KCQiAosmPBhCPARIsAHOen-MJQWnnwz86bQV8Ulf2kL-37twuYrcdpZ7ksT_MxDf6mpGiiNL7G7QaAhmiEALw_wcB&amp;ef_id=Cj0KCQiAosmPBhCPARIsAHOen-MJQWnnwz86bQV8Ulf2kL-37twuYrcdpZ7ksT_MxDf6mpGiiNL7G7QaAhmiEALw_wcB:G:s&amp;s_kwcid=AL!3652!3!552917619244!p!!g!!lipofectamine%20rnaimax&amp;cid=bid</a> |

DOI [to be added]

|                           |            |                                                                                                                                                                                                                                                                                                                                                                                                                                                                                                                                                                                                                                                                                                                                                                                           |
|---------------------------|------------|-------------------------------------------------------------------------------------------------------------------------------------------------------------------------------------------------------------------------------------------------------------------------------------------------------------------------------------------------------------------------------------------------------------------------------------------------------------------------------------------------------------------------------------------------------------------------------------------------------------------------------------------------------------------------------------------------------------------------------------------------------------------------------------------|
|                           |            | <a href="#">clb_tfx_r01_co_cp0000_pjt0000_bid00000_0se_gaw_bt_pur_con</a>                                                                                                                                                                                                                                                                                                                                                                                                                                                                                                                                                                                                                                                                                                                 |
| SB225002                  | Sigma      | <a href="https://www.sigmaaldrich.com/DE/de/product/sigma/sml0716">https://www.sigmaaldrich.com/DE/de/product/sigma/sml0716</a>                                                                                                                                                                                                                                                                                                                                                                                                                                                                                                                                                                                                                                                           |
| DMSO                      | Sigma      | <a href="https://www.sigmaaldrich.com/DE/de/product/sigma/d4540?qclid=Cj0KCQiAubmPBhCyARIsAJWNpiPOf6zyCII55M_PXjIGqjzz_GuRThqYeQAFjrLLCnQr1I5VliOoAy8aAlz5EALw_wcB">https://www.sigmaaldrich.com/DE/de/product/sigma/d4540?qclid=Cj0KCQiAubmPBhCyARIsAJWNpiPOf6zyCII55M_PXjIGqjzz_GuRThqYeQAFjrLLCnQr1I5VliOoAy8aAlz5EALw_wcB</a>                                                                                                                                                                                                                                                                                                                                                                                                                                                         |
| 4-hydroxytamoxifen        | Sigma      | <a href="https://www.sigmaaldrich.com/DE/de/product/sigma/h7904">https://www.sigmaaldrich.com/DE/de/product/sigma/h7904</a>                                                                                                                                                                                                                                                                                                                                                                                                                                                                                                                                                                                                                                                               |
| ISce                      | NEB        | <a href="https://international.neb.com/products/r0694-iscei#Product%20Information">https://international.neb.com/products/r0694-iscei#Product%20Information</a>                                                                                                                                                                                                                                                                                                                                                                                                                                                                                                                                                                                                                           |
| MsI1                      | NEB        | <a href="https://international.neb.com/products/r0571-msli#Product%20Information">https://international.neb.com/products/r0571-msli#Product%20Information</a>                                                                                                                                                                                                                                                                                                                                                                                                                                                                                                                                                                                                                             |
| Not1-HF                   | NEB        | <a href="https://international.neb.com/products/r3189-noti-hf#Product%20Information">https://international.neb.com/products/r3189-noti-hf#Product%20Information</a>                                                                                                                                                                                                                                                                                                                                                                                                                                                                                                                                                                                                                       |
| T4 DNA polymerase         | NEB        | <a href="https://international.neb.com/products/m0203-t4-dna-polymerase#Product%20Information">https://international.neb.com/products/m0203-t4-dna-polymerase#Product%20Information</a>                                                                                                                                                                                                                                                                                                                                                                                                                                                                                                                                                                                                   |
| MEGA short Script T7 kit  | Invitrogen | <a href="https://www.thermofisher.com/order/catalog/product/AM1354?qclid=Cj0KCQiAxc6PBhCEARIsAH8Hff3C0qTWEOnJt-6yKnr86hgdaiQIYFC2Rd0zUwzE93Lbz1NfGSjAPXYaAvNjEALw_wcB&amp;ef_id=Cj0KCQiAxc6PBhCEARIsAH8Hff3C0qTWEOnJt-6yKnr86hgdaiQIYFC2Rd0zUwzE93Lbz1NfGSjAPXYaAvNjEALw_wcB:G:s&amp;s_kwid=AL13652!3!557381067596!!!g!!&amp;cid=bid_clb_gme_r01_co_cp0000_pjt0000_bid00000_0se_gaw_dy_pur_con">https://www.thermofisher.com/order/catalog/product/AM1354?qclid=Cj0KCQiAxc6PBhCEARIsAH8Hff3C0qTWEOnJt-6yKnr86hgdaiQIYFC2Rd0zUwzE93Lbz1NfGSjAPXYaAvNjEALw_wcB&amp;ef_id=Cj0KCQiAxc6PBhCEARIsAH8Hff3C0qTWEOnJt-6yKnr86hgdaiQIYFC2Rd0zUwzE93Lbz1NfGSjAPXYaAvNjEALw_wcB:G:s&amp;s_kwid=AL13652!3!557381067596!!!g!!&amp;cid=bid_clb_gme_r01_co_cp0000_pjt0000_bid00000_0se_gaw_dy_pur_con</a> |
| mMessage mMachine SP6 kit | Invitrogen | <a href="https://www.thermofisher.com/order/catalog/product/AM1340?SID=srch-srp-AM1340">https://www.thermofisher.com/order/catalog/product/AM1340?SID=srch-srp-AM1340</a>                                                                                                                                                                                                                                                                                                                                                                                                                                                                                                                                                                                                                 |
