# Supplementary material
Source: PubMed Central journal article supplement (PMC8976759)
Supplement: NIHMS1786113-supplement-Supplemental_Publication_Material_1.pdf [file NIHMS1786113-supplement-Supplemental_Publication_Material_1.pdf]

CGCCATTCTGCCTGGGGACGTGCGGAGCAAGCTTGATTTAGGTGACACTATAGAATACAAGCTACTTGTTCTTTTTG  
CAGATGCACTTATTTGGATTTTCTGTCTTCTGTCTCGCATTGTTTTATGCAAACCTTGCTTTTCGAGTCAAGTCACGC  
TACTATGAATACGATCAAGATCAAGCAGATGCCATGCAGGAGCATTACAGAGCCAGACCTGGTGGAGCAGTTGCGT  
TCAGCGGGTAGTGTGGATGAACTCATGAGGATAGTTTACCCTACCTACCGGATCATGCTGAAGTGCCGTTCCAAG  
ATGGGGTCGCGCTTACTTCGCAGAGAACCAAGCTCCACAGAAACAAGGTGCGGAGGAGGCCTCCTTTGCGGCTGCT  
TTCATCAATCTTGAACTTTTGAAAAGTATTGAGATAGAGTGGAGAAAGACGCTGTGCATGCCACGCCAAGTTTGT  
TAGATGTGGGGAAAGAGTTTGGGGCTACAAACACCTTCTATAAACACCCTGCGTGTCTGTCTACAGATGTGGGG  
GCTGCTGTAACAGTGAGGAGCTTCAGTGCAGGAACATCAGCACTTCATACATCAGCAAGACGTTGTTTGAATCAC  
AGTTCCAGTCAAGCAAGGGACCAAACCGGTCACCATAAGCTTCGCCAACCCACACTTCCTGCAGCTGTTTGTCAAAA  
CAAAATTTGTACCGACAGCAGCACTCAATCATAACGAAGGGCCCTAACAGAATGTCATGTGGCAAATAAAACATGC  
CCAAAGAATCACAGCTGGAGTAATCACTTATGCAAATGTGTGCTGCTGCCTGACACCCTTATTCAAACCCACATTC  
TGATTTTGAACGGACTTTTTCGCGCCCTGACAAAGAGCTGGATGAGGAGACGTGTCAGTGTGAATGCCGAAAAG  
AGCTAAGAAAAGCAGGCTGCGGACCACACCATTACCTAGACAAGAATACATGCCAGTGTGTGTGTAAGCACAGC  
CGTCCTCCTGCGGGCCTCAACAGAGCTTCAACAGGGACACCTGCCAGTGCACCTGTGCCAAAGTGTGTCCGAGGA  
GTCAACCTCTCAACCGACCAAATGTGTGTGTGAATGCACAGAGTCCCCTAACAGTGTCTTAAAAGGGAGACG  
GTTTCACCCGGCCACATGCAGCTGTGTCCGGCCTCCATGTAACGTGGACCCCAAGAGAAGGAAATGTAAGGAAAA  
TGAGTATTTAGTGTGAGGAACTGTGTCACTGTATACCCACATACTGGGGAAGACTGGACTAATCGAGCCTCTAGAAC  
TATAGTGAGTCGTATTACGTAGATCCAGACATGATAAGATAATTGATGAGTTTGGACAAACCACAACCTAGAAATGC  
AGTGAAAAAATGCTTTATTTGTGAAATTTGTGATGCTATTGCTTTATTTGTAACCATTATAAGCTGCAATAAACAA  
GTTAACAAACAATTGCATTCATTTTATGTTTCAGTTTCAGGGGAGGTGTGGGAGGTTTTTTAATTTCGCGGCCG  
CGGCGCCAATGCATTGGGCCCCGTACCCAGCTTTTGTCCCTTATGAGGGTTAATTGCGCGCTTGGCGTAATCA  
TGGTCATAGCTGTTTCTGTGTGAAATTGTTATCCGCTCACAATCCACACAACATACGAGCCGGAAGCATAAAGT  
GTAAAGCCTGGGGTGCCTAATGAGTGAGCTAACTCACATTAATTGCGTTGCGCTCACTGCCCGCTTTCAGTCGGG  
AAACCTGTCGTGCCAGCTGCATTAATGAATCGGCCAACGCGCGGGGAGAGGCGTTTGCATTTGGGCGCTCTTC  
CGTTCTCCTGCTCACTGACTCGCTGCGCTCGGTGCTTCCGCTGCGGCGAGCGGTATCAGCTCACTCAAAGGCGGTA  
ATACGGTTATCCACAGAATCAGGGGATAACGCAGGAAAGAACATGTGAGCAAAAGGCCAGCAAAAAGGCCAGGA  
ACCGTAAAAAGGCCGCGTTGCTGGCGTTTTTCCATAGGCTCCGCCCCCTGACGAGCATCACAAAAATCGACGCTC  
AAGTCAGAGGTGGCGAAACCCGACAGGACTATAAAGATAACAGGCGTTTCCCCTGGAAGCTCCCTCGTGCGCTC  
TCCTGTTCCGACCCTGCCGCTTACCGGATACCTGTCCGCTTTTCTCCCTTCGGGAAGCGTGCGCTTTTCTCATAGCT  
CACGCTGTAGGTATCTCAGTTCCGGTGTAGGTCGTTCCGCTCCAAGCTGGGCTGTGTGCACGAACCCCCGTTACGCC  
CGACCGCTGCGCCTTATCCGGTAACTATCGTCTTGAGTCCAACCCGGTAAGACACGACTTATCGCCACTGGCAGCA  
GCCACTGGTAACAGGATTAGCAGAGCGAGGTATGTAGGCGGTGCTACAGAGTTCTTGAAGTGGTGGCCTAACTAC  
GGCTACACTAGAAGGACAGTATTTGGTATCTGCGCTCTGCTGAAGCCAGTTACCTTCGGAAAAAGAGTTGGTAGC  
TCTTGATCCGGCAAACAAACCACCGTGGTAGCGGTGGTTTTTTTTGTTTGAAGCAGCAGATTACGCGCAGAAAAA  
AAGGATCTCAAGAAGATCCTTTGATCTTTTCTACGGGGTCTGACGCTCAGTGGAACGAAAACTCACGTTAAGGGAT  
TTTGGTCATGAGATTATCAAAAAGGATCTTCACCTAGATCCTTTTAAATTAATAAATGAAGTTTTAAATCAATCTAAA  
GTATATATGAGTAACTTGGTCTGACAGTTACCAATGCTTAATCAGTGAGGCACCTATCTCAGCGATCTGTCTATTT  
CGTTCATCCATAGTTGCCTGACTCCCCGTGCTGTAGATAACTACGATACGGGAGGGCTTACCATCTGGCCCCAGTG  
CTGCAATGATACCGGAGACCCACGCTACCGGCTCCAGATTTATCAGCAATAAACAGCCAGCCGGAAGGGCCG  
AGCGCAGAAGTGGTCTGCAACTTTATCCGCCTCCATCCAGTCTATTAATTGTTGCCGGGAAGCTAGAGTAAGTAG  
TTCGCCAGTTAATAGTTTGCGCAACGTTGTTGCCATTGCTACAGGCATCGTGGTGTACGCTCGTCGTTTGGTATG  
GCTTCATTCAGCTCCGTTCCCAACGATCAAGGCGAGTTACATGATCCCCATGTTGTGCAAAAAGCGGTTAGCT  
CCTTCGGTCTCCGATCGTTGTGAGAAGTAAGTTGGCCGAGTGTATCACTCATGGTTATGGCAGCACTGCATAA  
TTCTCTACTGTCATGCCATCCGTAAGATGCTTTTCTGTGACTGGTGTGACTCAACCAAGTCATTCTGAGAATAGT

GTATGCGGCGACCGAGTTGCTCTTGCCCGGCGTCAATACGGGATAATACCGCGCCACATAGCAGAACTTTAAAAG  
TGCTCATCATTGGAAAACGTTCTTCGGGGCGAAAACCTCAAGGATCTTACCGCTGTTGAGATCCAGTTTCGATGTA  
ACCCACTCGTGCACCCAACCTGATCTTCAGCATCTTTACTTTACCAGCGTTTCTGGGTGAGCAAAAACAGGAAGG  
CAAAATGCCGCAAAAAGGGAATAAGGGCGACACGGAAATGTTGAATACTCATACTCTTCCTTTTCAATATTATT  
GAAGCATTATCAGGGTTATTGTCTCATGAGCGGATACATATTTGAATGTATTTAGAAAAATAACAAATAGGGGT  
TCCGCGCACATTTCCCCGAAAAGTGCCACCTAAATTGTAAGCGTAAATATTTTGTAAAATTCGCGTTAAATTTTGT  
TAAATCAGCTCATTTTTTAACCAATAGGCCGAAATCGGCAAAAATCCCTTATAAATCAAAAAGAATAGACCGAGATAG  
GGTTGAGTGTTGTTCCAGTTTGAACAAGAGTCCACTATTAAGAACGTGGACTCCAACGTCAAAGGGCGAAAAA  
CCGTCTATCAGGGCGATGGCCCACTACGTGAACCATCACCTAATCAAGTTTTTTGGGGTTCGAGGTGCCGTAAAGC  
ACTAAATCGGAACCCTAAAGGGAGCCCCGATTTAGAGCTTGACGGGGAAAGCCGGCGAACGTGGCGAGAAAGG  
AAGGGAAGAAAGCGAAAGGAGCGGGCGCTAGGGCGCTGGCAAGTGTAGCGGTCACGCTGCGCGTAACCACCAC  
ACCCGCCGCGCTTAATGCGCCGCTACAGGGCGCGTCCATTGCCATTAGGCTGCGCAACTGTTGGGAAGGGCG  
ATCGGTGCGGGCCTCTTCGCTATTACGCCAGTCGACCATAGCCAATCAATATGGCGTATATGGACTCATGCCAAT  
TCAATATGGTGGATCTGGACCTGTGCCAATCAATATGGCGTATATGGACTCGTGCCAATCAATATGGTGGATCT  
GGACCCAGCCAATCAATATGGCGGACTTGGCACCATGCCAATCAATATGGCGGACTTGGCACTGTGCCAACTG  
GGGAGGGGTCTACTTGGCACGGTGCCAAGTTTGAGGAGGGTCTTGGCCCTGTCCAAGTCCGCCATATTGAATT  
GGCATGGTCCAATAATGGCGGCCATATTGGCTATATGCCAGGATCAATATATAGGCAATATCCAATATGGCCCTA  
TGCCAATATGGCTATTGGCCAGGTTCAATACTATGTATTGGCCCTATGCCATATAGTATTCCATATATGGGTTTTCT  
ATTGACGTAGATAGCCCTCCCAATGGGCGGTCCCATATACCATATATGGGGCTTCTAATACCGCCCATAGCCAC  
TCCCCATTGACGTCAATGGTCTCTATATATGGTCTTTCCTATTGACGTCATATGGGCGGTCTATTGACGTATATG  
GCGCCTCCCCATTGACGTCAATTACGGTAAATGGCCCGCTGGCTCAATGCCATTGACGTCAATAGGACCACC  
ACCATTGACGTCAATGGGATGGCTCATTGCCATTCATATCCGTTCTCACGCCCCCTATTGACGTCAATGACGGTAA  
ATGGCCCACTTGGCAGTACATCAATATCTATTAATAGTAACTTGGCAAGTACATTACTATTGGAAGGACGCCAGGG  
TACATTGGCAGTACTCCATTGACGTCAATGGCGGTAAATGGCCCCGCGATGGCTGCCAAGTACATCCCCATTGACG  
TCAATGGGGAGGGGCAATGACGCAATGGGCGTTCATTGACGTAAATGGGCGGTAGGCGTGCCTAATGGGAG  
GTCTATATAAGCAATGCTCGTTTAGGGAACAnnt
