# Supplementary material
Source: PubMed Central journal article supplement (PMC8976759)
Supplement: NIHMS1786113-supplement-Supplemental_Publication_Material_2.pdf [file NIHMS1786113-supplement-Supplemental_Publication_Material_2.pdf]

TAGGATAACAGGGTAATGCGCGTAATACGACTCACTATAGGGCGAATTGGAGCTcattctcaggggtgctgcttggt  
atttcaaaaaatcaaattaattttattaaactattagaacgagcatgtttgtctatatgtctacagaagataaaaaataataggagtaacagttataaa  
acaacacatttgtttctattgattgtgaccacactgggtctcattaagttagattaaagacacactaactgggtcaaaagcagcagattgatttcata  
gcaccagggtaaactttctaacttttaccgcaatcatatacattaaaataaatacagaccacgactgaacaaggaggatgatctccaatattaa  
caaagagactgtgcctatttctgagggtaaacatgacctcaagtttagcaagttgttttaacactacaaaaatagttaagacctgcaatcccag  
aataaagtattggttttaaccaatcaatatagtacagtaaacatccattgtttgtgaaacgttaaacaaatctgaccaaagctattagcttataaa  
aacaggtttgccttctatgtagctgaaaacaccacagggcccgttttctactgtgtaaacatttcagcaagattttttattgcatttttttactgaat  
cgttcaaacattttatcattttagttgttcattcattgcaactggaaaaacaacatcacacaaccgcacatatttcagcaataagtacaataaaaa  
ctcaataaaaaaaaaacattttaaatctttgtattttgaccgctgttcgctgaatttcacggtaaaactctggaatctccactacattcctctcagcg  
gctcctcaatgacagctgaagaagtacggcggtgctgctgtgttttgattggctgaattcactggaggctccagaacagtgtagagctgaac  
gggtgctgctgctgtatttaaggcgaaagagagaccgcagagaaactcaaccgaagagaagcgaactgacaaagaagaaaagagcagcct  
gacaggactttccccgacgaggtgtttattcgtctatttaagaatctactgtaagtaagtccaatattgtactctattggctaatacagaattat  
agagattatgtacttaagtcaaaaaatcaactttgtatatgtaactttttacatgtggactgctatgttcatcttatttttagtctactagaaaatta  
tatttcccgtttcacaataaggatttttaaaaaagcaatgaacagacgggcatttactttatgttgctgacatttttatatgagcataataaccataa  
atactagcaaatgtcctaataatgaattgtttaatgtgtctacaaaagaaaattagcgttttactgtacaactaataaactgggtattaagagaat  
ttcactgttgactagaaaaatctttcataatgaacaattgcaccataaattgtataaataaaaaataattctaattgttttttttctctgatcgata  
ccgTCGgCGCGCCATGAATTACCATACACGATTGTTGGAGCAAAGTTATTAGTTTTATTCATCATAAGCTTTTCTCTC  
ACTCATGGATACCCGTCAGTCTGTTCCAGGGCAACGCGTATTACAGGAGCCGTTACAGGCACCGAAATAAAAACT  
GGTGCCTTTTATCGTCCAAAAGAATGTGAGCTGCGCGGTTCAAGGCAGCGTGGAGAGTCACGTTGAACCTGAAG  
CCGCGCGCTGTCTGAGCACCAGCCTGACTGTGAGCCACAAATGATATACCGTACTCGATTTTCGTCCAACCTTATAA  
GATAGCATACAAGACCGTACTGAATTAGAATGGCGGTGCTGTCCAGGATATCAAGGTCCAGACTGCAGGGAAG  
TTAAAGGCTTTCAAATGGACAAATAGCGAATCCACAATCATACCCACAATATCCACAGCATGGACAAACTCGAAC  
TGCACAAAGACCAGAGCGGGCGGAACTGTACAATATGACTTGAGAAGAGGAGCTGACAGAACACGAATGTTGG  
AAGAAGAAGTGAACGTCTCAGCCAGACAGTTCTGGATCTTCAAGCTGCCATGACAGGTATGGCAGAGAACCTGC  
GGACAGACATACAAGAGGACACCAGCAAGATGCTCATTACCCTCTCAATGACAGGACTTCACCTGACAGCGCAA  
GAACTGGAGGCACAGAAGAGAGTGTGGTGCTTCTGACGGCCACCAGGCTATGAGAGGCCAAACTCATGGAGAA  
AGAGAAATGGAAACGGTGATGGCAAGACTCAATGACGTACAGATGCTCTCAAACCAAAGACGAAGCTCTTGA  
GGAATTGCGGGGAACAGTGACGGGACATGACAATCAAATCCGAATGCTTATGGATAGTGCTTCTCAAAGCCTACC  
AGTTGCGGGTGATTCTTCTCAAGATGTAGACGTCTTACGGCTTACGTTGATGAGAAATTTGAGAAGCTCAAGAAG  
GATTTTGTGTAACCTTGAAGACGAGATGACCAAAGTGAAGACGGCATGTGATGAAAAGATTAGTCTCTTCAA  
AAACATGTGAAGAAGGACAGGAGAACGGCTACGGGAGCCTACCAATCTAGTGAACAACAAGGAAGCTGAGCTT  
AGAAAGGAGATTCTGAGCTCCGATTGGATTTGTCCATGTCTGATGGTCTCATGCCACAAACCGCCAAACGACCA  
TTGGAAAACTGATGGTGACTACAGTACTTGAGGAGGGAAATAGCTCGAGTGGCAGAGGCTCATCGGGTCTC  
AATGCCAGAATGGACAATGAGCTTGTGCTCTCACTGAAGATGGAAGATATAATCGGTTACGCCTGGAG  
GACCTGGAGGACAGGATGAACGTCACTGAGAGGAACGCAGAGACTTATTGTTTCTATGTGGAGGAAAACTTACC  
AAGGACATAATGAATGAAGTAGCTATGTTACATCAACTTCTGATCAGAACTGGATGGTATTACAGGATCAGTTCA  
CTTCCATGTTGATTGAAATGAACAACAATTCCTTTCTCTGATTTCAAGTGATTCTGTTGATGCACTTCAAACCTCAGG  
TACTGCAAACAAGTTCCTTATACAGGGTTAGAGGACAAGTTTAGTACACTTGGGCAAAATTTGTTCTACCAACTG  
CAAAGCAACCAACCTCTGATTCCAAAAAGCCTGAAGGTCTAGAAAGTGTGTAAGGATGTGACTCTGCAG  
AAATGATCTGGATGTTTTGCGTTCTGATTTGTAAACAGCATAGCAAAGATCCACGCATTAGAGGATACTATTAGG  
ATGTCACCTGAAAAACAATTCATCAATGCCATATGCAGGATACCGGCAAAAGACTTCATGCTTTGAGTGACAATG  
TAATTGGCTTGTCTGGGGCAATAACAGGATTGGGAGACACGGTTAGCAAATTTAGCCAAGACCTTCACTTTGAA  
TTCACTTGTGCCAAACAGGGCAGGTTGACAATCCATCTCTCAGGCAGAACTGGCAGACCAAGCCACAACCCAG  
ATTGCGGAGCTAAAAGACAAACTGGATGCACTGAATGTCGAGTGACCACAGAGTTGAGTATGTGTAAGTCAAC

ACA ACTGGAGTAGCTGAGGGTGTCTCTGCAGTGGATGACAGGGTGAAGGCTCTGGAGAAGATCTGCAGACGGCT  
TGACGGTGGAGCGAGCAATATCCAAGACCTTTTCGGGGGAATTGGAGAGGAAGGTGGCACAAATGAATAACACCC  
TGGGAAGTCATTCAGGAGAGATCTTA ACTCTTCAGAACTCCCTTCTGAATTTTCACAGCCAGCTAGCAGGACTGGC  
TAAACAGATTATAAGGACCATACGAGTAAAGAACAAGGACTGCCTGTTCCGGCAAGAGAAACCAAGTGTCTGTCCC  
TGACACTAGAGCTCCAACAAAACCCATGAGACCATATGCTCCTCATATCAACATACCATTGATCATACCCACAGGA  
CAGTGCCAGCACCCACCGGCCATCCCCATGTGCGCCAGCAGCCGCACGTCCACACCCGACCCTACTACCCTCAGCC  
ACCCAGTAACCCAAGACGTCCCATCTACCACATAACAACCCAGCAACCAGTCATCCACGAGCCTGTGGTGGTCACC  
GGACAGGCTGGTCCACCTGGGTATGTGCGCAGGGTACGGTCAGACGGGATCAGAGCTCAGAGGACACCAAAAC  
ACCTGTTACAGGATTTGCAGGAGCTCCAGGTTATCCTCCTGTCAACCCCTGTCTCATATGATACCAAAACAGCCTCCTC  
CAGCAGCTGTCAATGTCCATGGAGTCTGCGCATCAAAGACCCATTGCTGCTCCAGTGTACAGCAGA ACTCGGT  
GATGGACCCATTTTCTTCTCTGCTGGTCTCACACGTCAGACTTTCTCTGGGGACTTCGGCATCATTGCCTTTGACA  
GAGTGCTGGTCAACGATGGAGGACACTATAACCCCTCAGACAGGGATCTTTACGGTGCCCACTGACGGCCGTTATC  
TGGTGACGGCTGTTTTATCCGCCAGCGGGGTGAGCATGCAGAAGCTGTGCTCTCAGTATCCAATCGCAGCGTGC  
AGAAGTTGGACACGGCGGGTACTCGAGTGGACACCTGCGACTGACCCAAGATCAGTGTGCATGTGGAGGGTCA  
GCGTCTTTAGCCTCATCCTCCCGCTCCACAGAGGTGACACCATGGCCTTGGTCCGCACTGCTGGTAAGCTGGCGG  
TCTCCGAATCAAGAGAGATCCTCTCCACCTCAGCGCTATATCCTCTACTCGCCTCAAGCGAAGAGActcagGGAA  
GCGGAGCTACTAACTCAGCCTGCTGAAGCAGGCTGGAGACGTGGAGGAGAACCCTGGACCTatggtgagcaagggcg  
aggaggtcatcaaagagttcatgcgcttcaaggtgcatggagggctccatgaacggccacgagttcagatcgagggcgagggcgagggccgccc  
cctacgagggcaccagaccgccaagctgaaggtaccaagggcgccccctgcccttcgctgggacatcctgtccccccagttcatgtacggctcc  
aaggcgtactgaagcaccgcccacatccccgattacaagaagctgtccttccccgagggctcaagtgaggagcgcgtgatgaacttcgaggacg  
gcggtctggtgaccgtgaccaggaactcctcctgcaggacggcacgctgatctacaaggtgaagatgcgcgccaccaactccccccgacggccc  
cgtaatgcagaagaagaccatgggtgaggagcctccaccgagcgcctgtacccccgcagcgctgtgaagggcgagatccaccagggcctgaa  
gctgaaggacggcgccactacgtggtgagttcaagaccatctacatggccaagaagccgtgcaactgcccggctactactacgtggacaccaag  
ctggacatcacctcccacaacaggactacaccatcgtggaacagtacgagcgcctccgagggccgccaccactgttctggggcatggcaccggca  
gcaccggcagcggcagctccggcaccgctcctccgaggacaacaacatggcctcatcaaagagttcatgcgcttcaaggtgcatggagggctc  
catgaacggccacgagttcagatcgagggcgagggcgagggcgccccctacgagggcaccagaccgccaagctgaaggtgaccaagggcgggc  
ccctgcccttcgctgggacatcctgtccccccagttcatgtacggctcaagggctactgaagcaccgcccacatccccgattacaagaagctgt  
ccttccccgagggcttcaagtgaggagcgcgtgatgaacttcgaggacggcggtctggtgaccgtgaccaggaactcctcctgcaggacggcacgctg  
atctacaaggtgaagatgcgcgccaccaactccccccgagggccccgtaatgcagaagaagaccatgggtgaggagcctccaccgagcgcctgt  
acccccgcagcgctgtgaagggcgagatccaccagggcctgaagctgaaggacggcgccactacctggtgagttcaagaccatctacatgg  
ccaagaagccgtgcaactgcccggctactactacgtggacaccaagctggacatcacctcccacaacaggactacaccatcgtggaacagtacga  
gctcctccgagggccgccaccactgttctgtacggcatggacgagctgtacaagTAAttaattaaggccGCGACTCTAGATCATAATCAG  
CCATAACCATTTGTAGAGGTTTTACTTGCTTTAAAAAACCTCCACACCTCCCCCTGAACCTGAAACATAAAATGA  
ATGCAATTGTTGTTGTTAACTTGTTTATTGCAGCTTATAATGGTTACAAATAAAGCAATAGCATCACAAATTTACAA  
AATAAAGCATTTTTTTCACTGCATTCTAGTTGTGGTTTTGCCAAACTCATCAATGTATCTTAATCGAGGGGGGGCCC  
GGTACCCACCGCGTGGCGGCGATCTCTCCCAGCATGCCTGCTATTGTCTTCCAATCCTCCCCCTTGTCTGCTCTG  
CCCCACCCACCCCCAGAATAGAATGACACCTACTCAGACAATGCGATGCAATTTCTCATTTTATTAGGAAAGGA  
CAGTGGGAGTGGCACCTTCCAGGGTCAAGGAAGGCACGGGGGAGGGGCAAACAACAGATGGCTGGCAACTAGA  
AGGCACAGTCGAGGCTGATCAGCGGGCCGCTTACTTGTACAGCTCGTCCATGCCGAGAGTGATCCCGGCGGCGG  
TCACGA ACTCCAGCAGGACCATGTGATCGCGCTTCTGTTGGGGTCTTTGCTCAGCTTGGACTGGGTGCTCAGGTA  
GTGGTTGTCGGGCAGCAGCACGGGGCCGTCGCCGATGGGGGTGTTCTGCTGGTAGTGGTCGGCGAGCTGCACGC  
TGCCGTCCTCGATGTTGTGGCGGATCTGAAGTTGGCCTTGATGCCGTTCTTCTGCTTGTGCGGCGGTGATATAGAC  
GTTGTGCTGATGGCGTTGACTCCAGCTTGTGCCCCAGGATGTTGCCGTCCTCCTTGAAGTCGATGCCCTCAGCT  
CGATGCGGTTACCAGGGTGTGCGCCTCGAACTTACCTCGGCGCGGGTCTTGAGTTGCCGTCGTCCTTGAAGAA

GATGGTGCCTCCTGGACGTAGCCTTCGGGCATGGCGGACTTGAAGAAGTCGTGCTGCTTCATGTGGTTCGGGGTA  
GCGGGCGAAGCACTGCACGCCCCAGGTCAGGGTGGTTCACGAGGGTGGGCCAGGGCACGGGCAGCTTGCCGGTG  
GTGCAGATGAACTTCAGGGTCAGCTTGCCGTAGGTGGCATCGCCCTCGCCCTCGCCGGACACGCTGAACTTGTGG  
CCGTTTACGTCGCCGTCCAGCTCGACCAGGATGGGCACACCCCGGTGAACAGCTCCTCGCCCTTGCTCACCATGTt  
gtcagacctgtaactcctactgtaacttattgcacctgatgaacaaaagatgtgaactgaacgcaagtaggaggtaatagaggctagtacgtac  
aaagatcccaaatgatgtgtccggccttagtggaggcagaccctgttatatactgtgctgcagaaagaggggcttacaatggatctctctgg  
aatggcattatctcatggtgggaacagtgtgtcagcagaatcagcggggtggactctgacctgagaatgacagtctagcactgaatggctcagacaa  
tactcttggccaactatcaccggaaaataagtgcctgcaaaaacaaaccagaccagatgaagctacatggctgtagaacgtcagatttaagtgt  
tgtggcacttggttcaccagattaaagactaatttttaaatcacagataatcaatcgcttttttttctgactgaaaagcttagactggaaaat  
tctttgaaaaagtttgactacagaaaataatacataacatctgactgaatgcacactattaatGGTACCCAGCTTTTGTCCCTTTAG  
TGAGGGTTAATTGCGCGCTAGGGATAACAGGGTAATACGCGCTCACTGGCCGTCGTTTTACAACGTCGTGACTGG  
GAAAACCTGGCGTTACCCAACCTAATCGCCTTGACGACATCCCCCTTCGCCAGCTGGCGTAATAGCGAAGAGG  
CCCGCACCGATCGCCCTTCCCAACAGTTGCGCAGCCTGAATGGCGAATGGAAATTGTAAGCGTTAATATTTTGTTA  
AAATTCGCGTTAAATTTTTGTTAATCAGCTCATTTTTTAACCAATAGGCCGAAATCGGCAAAATCCCTTATAAATCA  
AAAGAATAGACCGAGATAGGGTTGAGTGTGTTCCAGTTTGAACAAGAGTCCACTattaaagaacgtggactccaactc  
aaagggcgaaaaacgtctatcaggcgatggcccactacgtgaaccatcacctaatacaagtttttggggctcagagtgccgtaaacgactaaatcg  
gaaccctaaagggagccccgatttagactgtgacggggaaagccggcgaaactggcgagaaaggaagggaaagaaagcgaagggagcggcgct  
agggcgctggcaagtgtagcgtgacgtgctgcaaccaccacaccgcccgttaatgcccgtacagggcgctcaggtggcacttttcggg  
gaaatgtgctggaaccctattgtttattttctaaatacattcaaatatgtatccgctcatgagacaataaccctgataaatgcttcaataatattga  
aaaaggaagagtatgattcaacattccgtgtgccttattccctttttgcgccattttgccttctgtttttgctcaccagaaacgtggtgaaa  
gtaaaagatgctgaagatcagttgggtgacgagtggttacatcgaactggatctcaacagcggtaagatcctgagagttttcgccccgaagaacg  
ttttcaatgatgagcacttttaaagttctgctatgtggcgcttattatccgtattgacccgggcaagagcaactcgtgcccatacactattctc  
agaatgacttggttagtactcaccagtcacagaaaagcatcttacggatggcatgacagtaagagaattatgagtgctccataacatgagtgat  
aacactgcccgaacttacttctgacaacgatcggaggaccgaagagtaaccgctttttgcaacatgggggatcatgtaactcgcttgatcgt  
tgggaaccggagctgaatgaagccatacacaacgacgagcgtgacaccacgatgctgtagcaatggcaacaacgttgccaaactattaactggc  
gaactacttactctagcttcccggcaacaattaatagactggatggaggcggataaagttgaggaccacttctgctcggcccttcggctggctgg  
tttattgctgataaatctggagccggtgagcgtgggtctcgggtatcattgacgactggggccagatggttaagccctccgctatcgtatgtatctaca  
cgacggggagtcaggcaactatggatgaacgaaatagacagatcgtgagataggtgctcactgattaagcattggttaactgacagcaagttta  
ctcatataacttttagattgatttaaacttatttttaatttaaagatctaggtgaagatcctttttgataatctcatgacaaaatcccttaactgta  
gtttctgttccactgagcgtcagaccctgtagaaagatcaaaggatcttctgagatccttttttctgctgtaactctgctgcttcaaaaaaa  
ccaccgctaccagcgggtggtttgtttgcccgatcaagagctaccaactcttttccgaagtaactggcttcagcagagcgcagatacacaactgct  
cttctagtgtagccgtagttagccaccactcaagaactctgtagaccgctacatacctgctctgtaactctgttaccagtggtgctgctccagtg  
cgataagtcgtgtcttaccgggttgacTCAAGACGATAGTTACCGGATAAGGCGCAGCGGTTCGGGCTGAACGGGGGGTTC  
GTGCACACAGCCCAGCTTGAGCGAACGACCTACACCGAAGTACGATACCTACAGCGTGAGCTATGAGAAAGCGC  
CACGCTTCCGAAGGGAGAAAGGCGGACAGGTATCCGGTAAGCGGCAGGGTTCGGAACAGGAGAGCGCACGAGG  
GAGCTTCCAGGGGAAACGCTGGTATCTTTATAGTCTGTGCGGTTTCGCCACCTCTGACTTGAGCGTCGATTTTT  
GTGATGCTCGTCAGGGGGCGGAGCCTATGGAAAACGCCAGCAACGCGGCCTTTTTACGGTTCCTGGCCTTTTG  
CTGGCCTTTTGCTCACATGTTCTTTCTGCGTTATCCCTGATTCTGTGGATAACCGTATTACCGCCTTTGAGTGAGC  
TGATAACGCTCGCCGAGCCGAACGACCGAGCGCAGCGAGTCAGTGAGCGAGGAAGCGGAAGAGCGCCCAATAC  
GCAAACCGCCTCTCCCGCGGTTGGCCGATTATTAATGCAGCTGGCACGACAGTTTTCCCGACTGGAAAGCGG  
GCAGTGAGCGCAACGCAATTAATGTGAGTTAGCTCACTCATTAGGCACCCAGGCTTTACACTTTATGCTTCCGGC  
TCGTATGTTGTGTGGAATTGTGAGCGGATAACAATTTACACAGGAAACAGCTATGACCATGATTACGCCAAGCG  
CGT
