# Supplementary material
Source: PubMed Central journal article supplement (PMC8976759)
Supplement: NIHMS1786113-supplement-Supplemental_Publication_Material_3.pdf [file NIHMS1786113-supplement-Supplemental_Publication_Material_3.pdf]

gtagcaagttgttttaactacaaaaatagttaagactgcaatcccagaataaagtattggttttaaccaatcaatatagtagtaaacatccat  
ttgttttggtaaacgtaaacaaatctgaccaaagctattagcttatataaacagggttgcttctatgtagctgaaaacaccacaggccccgatttgc  
tactgtgtaaacatttcagcaagatttttttattgcatttttttactgaatcgttcaaacattttatcattttagtttggcattcattgcaactggaaaa  
caacacatcacacaaccgacatatttcagcaataagtacaataaaactcaataaaaaaacattttaaatctctttgtattttgaccgctgttc  
gcgtaatttcaggtaaaactctggaatctcactacattcctctcagcggctcctctcaatgacagctgaagaagtgcggcgctgctgctgtgtt  
ttgattggtcgaattcactggaggctccagaacagttagagctggaacgggtgctgctgctgtatttaaggggcgaagagagaccgagaga  
aactcaaccgaagagaagcacttgacaaagaagaaaagagcagcctgacaggactttccccgacgagggtttattcgtctatttaagaatctac  
tgtaaggaagtctcaatatattgactctattggctaatacagaattatagagattatgacttaatgtcaaaaaatcaactttgtatgtatctt  
ttacatgtggactgcctatgttcatcttttttaggtctactagaaaattatattccccgtttcacaataaggattttaaaaaagcaatgaacagacg  
ggcatttactttatgttctgacattttttatgagcataataaccataaatactagcaaatgtcctaatgaattgtgttaattgttctacaaaaga  
aaattagcgttttactgtacaactaataataacttggttattaagagaatttcacttgttactagaaaaatcctttcataatgaaacaattgcaccata  
aattgtataataataaaattaattctaattgttttttttctgatcgataaccgTCGAATTCCTCGACgGATCCAAGCTTATAACTTCGT  
ATAGCATACATTATACGAAGTTATCCGGTCGCCACCATGGTGAGCAAGGGCGAGGAGCTGTTACCCGGGGTGGTG  
CCCATCCTGGTTCGAGCTGGACGGCGACGTAAACGGCCACAAGTTCAGCGTGTCCGGCGAGGGCGAGGGCGATGC  
CACCTACGGCAAGCTGACCCTGAAGTTCATCTGCACCACCGCAAGCTGCCCGTCCCTGGCCACCTCGTGACC  
ACCCTGACCTGGGGCGTGCAGTGCTCAGCCGCTACCCCGACCACATGAAGCAGCAGACTTCTTCAAGTCCGCCA  
TGCCCGAAGGCTACGTCCAGGAGCGCACCATCTTCTTCAAGGACGACGGCAACTACAAGACCCGCGCCGAGGTGA  
AGTTCGAGGGCGACACCCTGGTGAACCGCATCGAGCTGAAGGGCATCGACTTCAAGGAGGACGGCAACATCCTG  
GGGCACAAGCTGGAGTACAACATCAGCCACAACGTCTATATCACCGCCGACAAGCAGAAGAACGGCATCAAG  
GCCAATTCAAGATCCGCCACAACATCGAGGACGGCAGCGTGCAGCTCGCCGACCACTACCAGCAGAACACCCCC  
ATCGGCGACGGCCCCGTGCTGCTGCCCGACAACCACTACCTGAGCACCCAGTCCGCCCTGAGCAAAGACCCCAAC  
GAGAAGCGCGATCACATGGTCTGCTGGAGTTCGTGACCGCCCGGGATCACTCTCGGCATGGACGAGCTGTAC  
AAGTAAAGCGGCCAAACCCGCTGATCAGCCTCGACTGTGCTTCTAGTTGCCAGCCATCTGTTGTTTGCCCCCTCCC  
CGTGCTTCTTACCCTGGAAGGTGCCACTCCACTGTCTTCTAATAAAATGAGGAAATTGCATCGCATTGTC  
TGAGTAGGTGTCATTCTATTCTGGGGGGTGGGGTGGGGCAGGACAGCAAGGGGGAGGATTGGGAAGACAATAG  
CAGGCATGCTGGGGATGCGGTGGGCTCTATGGCTTCTGAGGCGGAAAGAACCgcggcccgactctagatcataatcaGC  
CATACCACATTTGTAGAGTTTTACTTGCTTAAAAAACCTCCCACACCTCCCCGAACTGAAACATAAAATGAA  
TGCAATTGTTGTTGTTAACTGTTTATTGCAGCTTATAATGGTTACAAATAAAGCAATAGCATCACAAATTCACAA  
ATAAAGCATTTTTTTACTGCATTCTAGTTGTGGTTTGTCCAAACTCATCAATGTATCTTAAAGGCGTAAATTGTAAGC  
GTTAATATTTTGTAAAATTCGCGTTAAATTTTTGTTAAATCAGCTCATTTTTTAACCAATAGGCCGAAATCGGCAA  
ATCCCTTATAAATCAAAGAATAGACCGAGATAGGGTTGAGTGTGTTCCAGTTTGGAAACAAGAGTCCACTATTAA  
AGAACGTGGACTCCAACGTCAAAGGGCGAAAAACCGTCTATCAGGGCGATGGCCCACTACGTGAACCATCACCT  
AATCAAGATAACTTCGTATAGCATACATTATACGAAGTTATACCGTTCGCCACCATGAATTACCATACACGATTGTT  
TGGAGCAAAGTTATTAGTTTTATTATCATAAGCTTTTTCTCTCACTCATGGATACCCGTCAGTCTGTTCCAGGGCA  
ACGCGTATTACAGGAGCCGTTACAGGCACCGAAATAAAAACTGGTGCCTTTTATCGTCCAAAAGAATGTGAGCT  
GCGCGTTCAAGGCAGCGTGGAGAGTACGTTGAACCTGAAGCCGCGCTGTCTGAGCACCAGCCTGACTGT  
GAGCCACAAATGATATACCGTACTCGATTCGTTCAACTTATAAGATAGCATACAAGACCGTACTGAATTAGAAT  
GGCGGTGCTGTCCAGGATATCAAGGTCCAGACTGCAGGGAAGTTAAAGGCTTTTCAAATGGACAAATAGCGAATC  
CACAATCATACCCACAATATCCACAGCATGGACAAACTCGAAGTGCACAAAGACCAGAGCGGGCGGAAACTGTAC  
AATATGACTTGAGAAGAGGAGCTGACAGAACACGAATGTTGGAAGAAGAAGTGAACGTCTCAGCCAGACAGTT  
CTGGATCTTCAAGCTGCCATGACAGGTATGGCAGAGAACCTGCGACAGACATAAAGAGGACACCAGCAAGAT  
GCTCATTACCCTCCTCAATGACAGGACTTACCTGACAGCGCAAGAAGTGGAGGCACAGAAGAGAGTGTGGTGCT  
TCTTGACGGCCACCAGGCTATGAGAGGCCAAACTCATGGAGAAAGAGAAATGGAAACGGTGATGGCAAGACTCA  
ATGACGTACAGATGCTCTAAAACCAAAGACGAAGCTCTTGAGGAATTGCGGGGAACAGTGACGGGACATGAC

AATCAAATCCGAATGCTTATGGATAGTGCTTCTCAAAGCCTACCAGTTGCGGGTGATTCTTCTCAAGATGTAGACG  
TCCTCAGGCTTACGTTGATGAGAAATTTGAGAAGCTCAAGAAGGATTTTGTGTAACCTTGAAGACGAGATGA  
CCAACTGAAAACGGCATGTGATGAAAAGATTAGTCTCTTCAAAAAACATGTGAAGAAGGACAGGAGAACGGC  
TACGGGAGCCTACCAATCTAGTGAACAACAAGGAAGCTGAGCTTAGAAAGGAGATTTCGTGAGCTCCGATTGGAT  
TTGTCCATGTCTGATGGTCTCATGCCACAAACCGCCAAACGACCATTGGAAAACTGATGGTGACTACAGTGACT  
TGAGGAGGGAATAGCTCGAGTGGCAGAGGCTCATCGGGTCTCAATGCCAGAATGGACAATGAGCTTGAGCAT  
CTGTCTCACTGAAGATGGAAGATATAATCGGTTACGCCTGGAGGACCTGGAGGACAGGATGAACGTCACTGAG  
AGGAACGCAGAGACTTATTGTTTCTATGTGGAGGAAAACTTACCAAGGACATAATGAATGAAGTAGCTATGTTA  
CATCAACTTCTTGATCAGAACTGGATGGTATTGAGGATCAGTTCACTTCCATGTTGATTGAAATGAACAACAATC  
CTTCTCTGATTTCAAGTGATTCTGTTGATGCACTTCAAACCTCAGGTTACTGCAAACAAGTTCTTATACAGGGGT  
AGAGGACAAGTTTAGTACACTTGGGCAAATTTGTTCTACCAACTGCAAAAGCAACCAACCCCTCTGATTCCAAAAAG  
CCTGAAGGTCTAGAAAGTGTGTAAGGATGTGACACTCTGCAGAAATGATCTGGATGTTTTGCGTTCTGATTTG  
TAAACAGCATAGCAAAGATCCACGCATTAGAGGATACTATTAGGATGTCACCTGAAAAACAATTCATCAATGCCCA  
TATGCAGGATACCGGCAAAGACTTCATGCTTTGAGTGACAATGTAATTGGCTTGCTGGGGCAATAACAGGATT  
GGGAGACACGGTTAGCAAATTTAGCCAAGACCTTCACTTTGAATTCCACTTGTGCCAAACAGGGCAGGTTGAC  
AATCCATCTCTCAGGCAGAACTGGCAGACCAAGCCACAACCAGATTGCGGAGCTAAAAGACAAACTGGATGCA  
CTGAATGTCCGAGTGACCACAGAGTTGAGTATGTGTAAGTCAACACAACCTGGAGTAGCTGAGGGTGTCTCTGCA  
GTGGATGACAGGGTGAAGGCTCTGGAGAAGATCTGCAGACGGCTTGACGGTGGAGCGAGCAATATCCAAGACCT  
TTCGGGGGAATTGGAGAGGAAGGTGGCACAATGAATAACACCCTGGGAAGTCATTGAGGAGAGATCTTAACTC  
TTCAGAACTCCCTTCTGAATTTTACAGCCAGCTAGCAGGACTGGCTAAACAGATTGATAAGGACCATAACGAGTAA  
AGAACAAGGACTGCCTGTTGCGCAAGAGAAACCAGTGTCTGTCCCTGACACTAGAGCTCCAACAAAACCCATGAG  
ACCATATGCTCCTCATATCAACATACCATTGATCATACCCACAGGACAGTGCCAGCACCCACCGCCATCCCCATG  
TGCGCCAGCAGCCGCACGTCCACACCGACCCTACTACCCTCAGCCACCCAGTAACCCAAGACGTCCCATCTACCA  
CATAAACCCAGCAACCAGTCATCCACGAGCCTGTGGTGGTACCCGGACAGGCTGGTCCACCTGGGTATGTGCG  
CAGGGTCACGGTCAGACGGGATCAGAGCTCAGAGGACACCAAAACACCTGTTACAGGATTTGCAGGAGCTCCAG  
GTTATCCTCTGTCAACCCTGTCTCATATGATACCAACAGCCTCCTCCAGCAGCTGTCAATGTCCCATGGAGTCT  
GCGCATCAAAGACCCATTGCTGCTCCAGTGTACAGCAGAACTCGGTGATGGACCCATTTTCTTCTCTGCTGGTCT  
CACACGTCAGACTTTCTGTTGGGACTTTCGGCATCATTGCTTTGACAGAGTGTGGTCAACGATGGAGGACACTAT  
AACCTCAGACAGGGATCTTACGGTGGCCACTGACGGCCGTTATCTGGTGACGGCTGTTTTATCCGCCCAGCGGG  
GTGAGCATGCAGAAGCTGTGCTCTCAGTATCCAATCGCAGCGTGCAGAAGTTGGACACGGCGGGTTACTCGAGTG  
GACACCTGCGACTGACCCAAGATCAGTGTGCATGTGGAGGGTCAGCGTCTTTCAGCCTCATCCTCCCGCTCCACAG  
AGGTGACACCATGGCCTTGGTCCGCACTGCTGGTAAGCTGGCGGTCTCCGAATCAAGAGAGATCCTCTCCACCTC  
AGCGCTATATTCCTCTACTCGCCTCAAGCGAAGAGAGGGTCCGGAGCCACGAACCTCTCTCTGTTAAAGCAAGCAG  
GAGACGTGGAAGAAAACCCGGTCTATGGTGAGCAAGGGCGAGGAGGATAACATGGCCATCATCAAGGAGTTC  
ATGCGCTTCAAGGTGCACATGGAGGGTCCGTGAACGGCCACGAGTTGAGATCGAGGGCGAGGGCGAGGGCC  
GCCCCTACGAGGGCACCCAGACCGCCAAGCTGAAGGTGACCAAGGGTGGCCCCCTGCCCTTCGCTGGGACATCC  
TGTCCCCTCAGTTTATGTACGGCTCCAAGGCTACGTGAAGCACCCCGCCGACATCCCCGACTACTTGAAGCTGTC  
CTTCCCCGAGGGCTTCAAGTGGGAGCGCTGATGAACTTCGAGGACGGCGGCGTGGTGACCGTGACCCAGGACT  
CCTCCCTGCAGGACGGCGAGTTCATCTACAAGGTGAAGCTGCGCGGCACCAACTTCCCCTCCGACGGCCCCGTAAT  
GCAGAAGAAGACCATGGGCTGGGAGGCCTCCTCCGAGCGGATGTACCCCGAGGACGGCGCCCTGAAGGGCGAG  
ATCAAGCAGAGGCTGAAGCTGAAGGACGGCGGCCACTACGACGCTGAGGTCAAGACCACCTACAAGGCCAAGAA  
GCCCCGTGCAGCTGCCCCGCGCCTACAACGTCAACATCAAGTTGGACATCACCTCCCACAACGAGGACTACACCATC  
GTGGAACAGTACGAACGCGCCGAGGGCCGCACTCCACCGCGGCATGGACGAGCTGTACAAGTAAATCGATGA  
TGATCCAGACGATGATGATCCAGACATGATAAGATACATTGATGAGTTTGGACAAACCACAACCTAGAATGCAGTG

AAAAAATGCTTTATTTGTGAAATTTGTGATGCTATTGCTTTATTTGTAACCATTATAAGCTGCAATAAACAAGTTA  
ACAACAACAATTGCATTCATTTTATGTTTCAGGTTTCAGGGGAGGTGTGGGAGGTTTTTTAAAGCAAGTAAAACCT  
CTACAAATGTGGTATGGCTGATTATGATCCTCTAGATCAGATCTGCGAAGATACGGCCACGGGTGCTCTTGATCCT  
GTGGCTGATTTTGGACTGTGCTGCTCGCAGCTGCTGATGAATCACATACTTCTCCATTTTCTTCCACTGATTGACT  
GTTATAATTTCCCTAATTTCCAGGTCAAGGTGCTGTGCATTGTGTAATAGATGTGACATGACGTCACCTCCAAAG  
GACCAATGAACATGTCTGACCAATTTTCATATAATGTGAAAACGATTTTCATAGGCAGAATAAATAACATTTAAATTA  
AACTGGGCATCAGCGCAATTCAATTGGTTTGGTAATAGCAAGGGAAAATAGAATGAAGTGATCTCCAAAAAATAA  
GTACTTTTTGACTGTAAATAAAATTGTAAGGAGTAAAAAGTACTTTTTTTCTAAAAAATGTAATTAAGTAAAAGT  
AAAAGTATTGATTTTAAATTGACTCAAGTAAAGTAAAAATCCCCAAAAATAATACTTAAGTACAGTAATCAAGTAA  
AATTACTCAAGTACTTTACACCTCTGGTTCTTGACCCCTACCTTCAGCAAGCCCAGCAGATCCACTAGTTCTAGAG  
CGGCCGCCACCGCGGTGGAGCTCCAGCTTTTGTCCCTTAGTGAGGGTTAATTGCGCGCTTGGCGTAATCATGGT  
CATAGCTGTTTCTGTGTGAAATTGTTATCCGCTCACAATTCCACACAACATACGAGCCGGAAGCATAAAGTGTA  
AGCCTGGGGTGCCTAATGAGTGAGCTAACTCACATTAATTGCGTTGCGCTCACTGCCCCGTTTTCCAGTCGGGAAAC  
CTGTCGTGCCAGCTGCATTAATGAATCGGCCAACGCGCGGGGAGAGGCGGTTTTGCGTATTGGGCGCTCTTCCGCT  
TCCTCGCTCACTGACTCGCTGCGCTCGGTGCTCGGCTGCGGCGAGCGGTATCAGCTCACTCAAAGGCGGTAATAC  
GGTTATCCACAGAATCAGGGGATAACGCAGGAAAGAACATGTGAGCAAAGGCCAGCAAAGGCCAGGAACCG  
TAAAAAGGCCGCTTGTGGCGTTTTTCCATAGGCTCCGCCCCCTGACGAGCATCACAAAAATCGACGCTCAAGT  
CAGAGGTGGCGAAACCCGACAGGACTATAAAGATACCAGGCGTTTTCCCCTGGAAGCTCCCTCGTGCGCTCTCCT  
GTTCCGACCCTGCCGCTTACCGGATACCTGTCCGCTTTCTCCCTTCGGGAAGCGTGCGCTTTCTCATAGCTCACG  
CTGTAGGTATCTCAGTTCGGTGTAGGTCGTTCCGCTCCAAGCTGGGCTGTGTGCACGAACCCCCGTTCCAGCCGAC  
CGCTGCGCCTTATCCGGTAACCTATCGTCTTGAGTCCAACCCGGTAAGACACGACTTATCGCCACTGGCAGCAGCCA  
CTGGTAACAGGATTAGCAGAGCGAGGTATGTAGGCGGTGCTACAGAGTTCTTGAAGTGGTGGCCTAACTACGGCT  
ACACTAGAAGGACAGTATTTGGTATCTGCGCTCTGCTGAAGCCAGTTACCTTCGGAAAAAGAGTTGGTAGCTCTTG  
ATCCGGCAAACAAACCACCGCTGGTAGCGGTGGTTTTTTTGTGCAAGCAGCAGATTACGCGCAGAAAAAAGG  
ATCTCAAGAAGATCCTTTGATCTTTTCTACGGGTCTGACGCTCAGTGGAACGAAAACCTCACGTTAAGGGATTTTG  
GTCATGAGATTATCAAAAAGGATCTTACCTAGATCCTTTTAAATTAAAAAATGAAGTTTTAAATCAATCTAAAGTAT  
ATATGAGTAACTTGGTCTGACAGTTACCAATGCTTAATCAGTGAGGCACCTATCTCAGCGATCTGTCTATTTTCGTT  
CATCCATAGTTGCCTGACTCCCCGTCGTGTAGATAACTACGATACGGGAGGGCTTACCATCTGGCCCCAGTGCTGC  
AATGATACCGCGAGACCCACGCTCACCGGCTCCAGATTTATCAGCAATAAACCAGCCAGCCGGAAGGGCCGAGCG  
CAGAAGTGGTCTGCAACTTTATCCGCTCCATCCAGTCTATTAATTGTTGCCGGGAAGCTAGAGTAAGTAGTTTCG  
CCAGTTAATAGTTTGCGCAACGTTGTTGCCATTGCTACAGGCATCGTGGTGTACGCTCGTCTGTTGGTATGGCTTC  
ATTCAGCTCCGGTTCCCAACGATCAAGGCGAGTTACATGATCCCCATGTTGTGCAAAAAAGCGGTTAGCTCCTTC  
GGTCTCCGATCGTTGTCAGAAGTAAGTTGGCCGAGTGTTATCACTCATGGTTATGGCAGCACTGCATAAATCTCT  
TACTGTCATGCCATCCGTAAGATGCTTTTCTGTGACTGGTGAAGTACTCAACCAAGTCATTCTGAGAATAGTGTATGC  
GGCGACCGAGTTGCTCTTGGCCGCGTCAATACGGGATAATACCGCGCCACATAGCAGAACTTTAAAGTGCTCA  
TCATTGAAAACGTTCTTCCGGGCGAAAACCTCAAGGATCTTACCGCTGTTGAGATCCAGTTGATGTAACCCAC  
TCGTGCACCCAACTGATCTTCAGCATCTTTACTTTACCAGCGTTTCTGGGTGAGCAAAAACAGGAAGGCAAAAT  
GCCGCAAAAAGGGGAATAAGGGGCGACACGGAAATGTTGAATACTCATACTTCTCTTTTCAATATTATTGAAGCA  
TTTATCAGGGTTATTGTCTCATGAGCGGATACATATTTGAATGTATTTAGAAAAATAAACAATAGGGGTTCCGCG  
CACATTTCCCCGAAAAGTGCCAC
