# Supplementary material
Source: PubMed Central journal article supplement (PMC8976759)

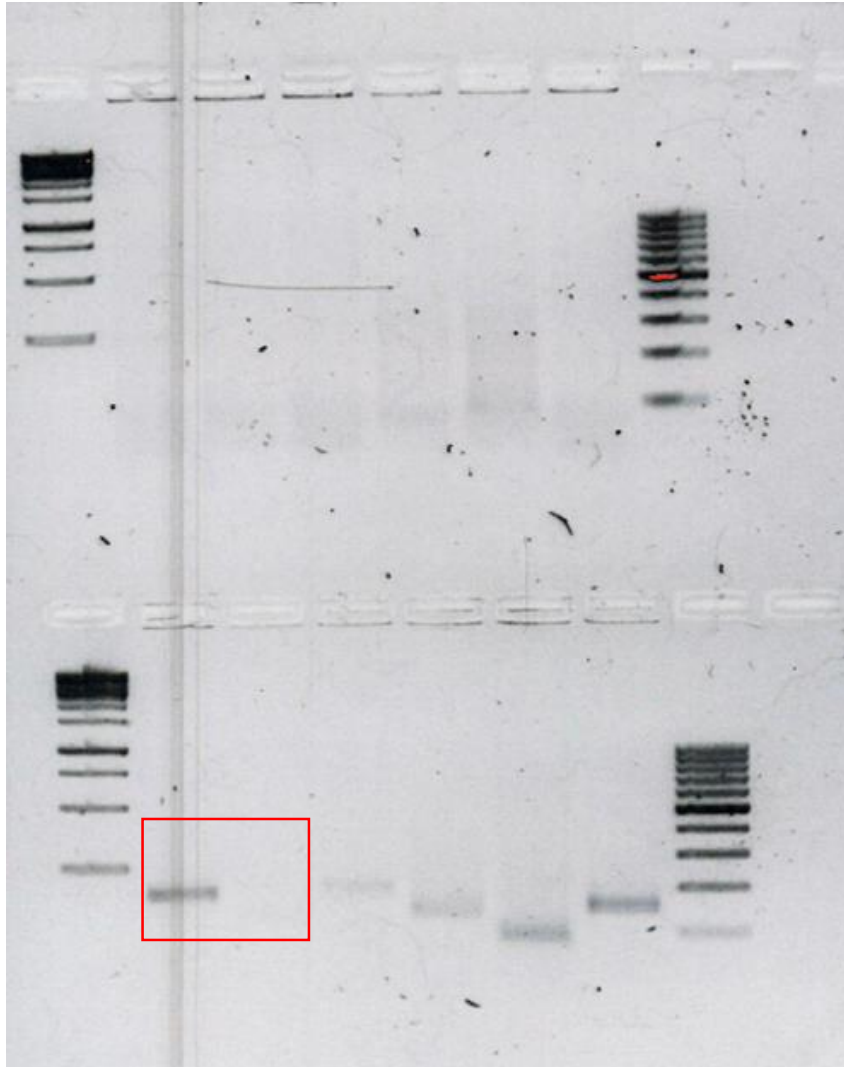

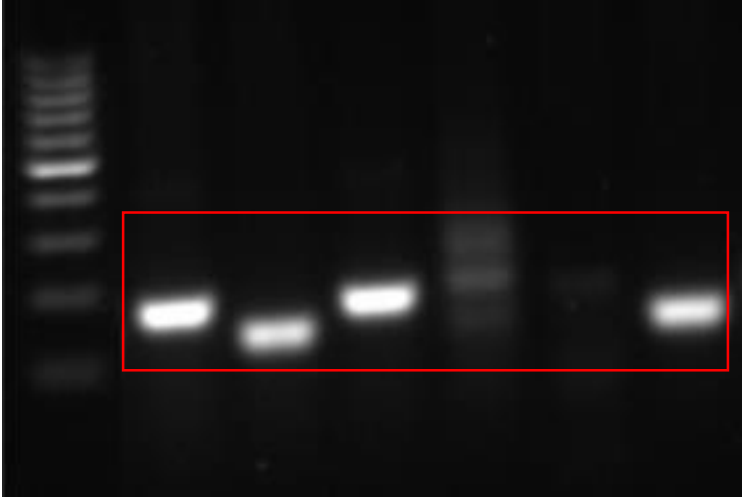

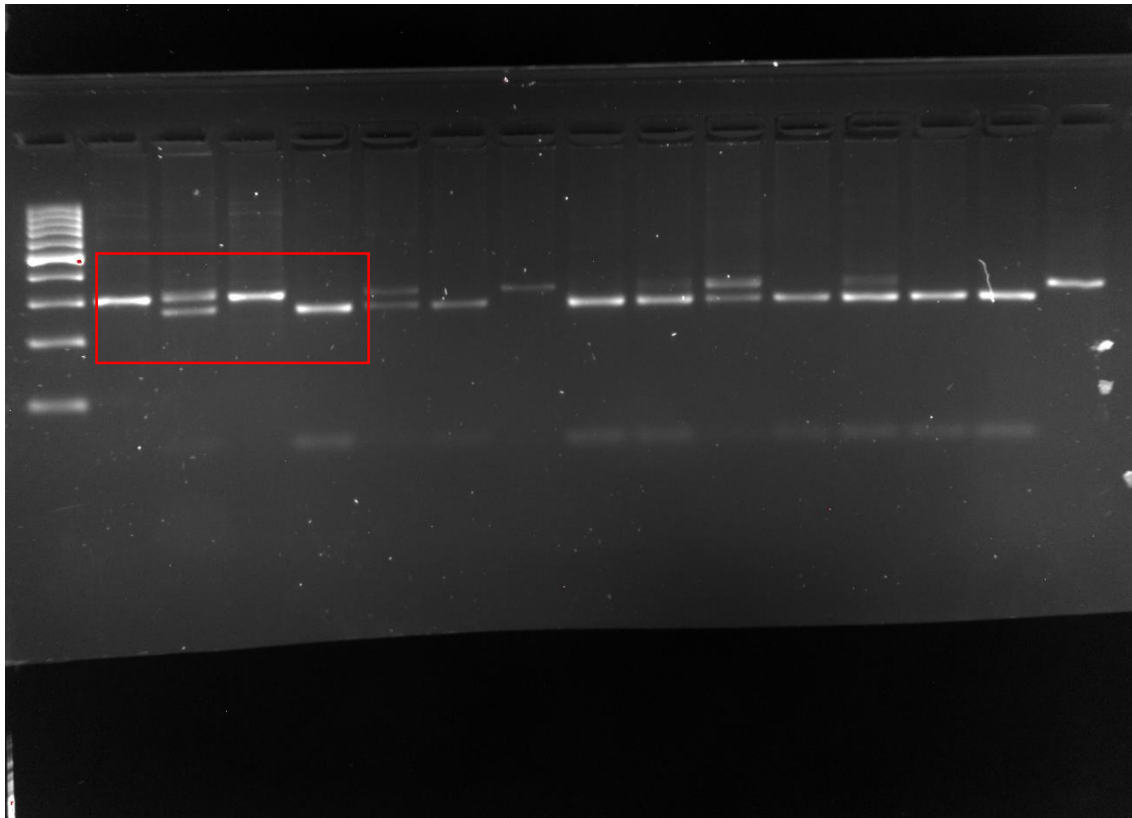

Supplement: NIHMS1786113-supplement-319929_Uncut_Gel_Blots.pdf [file NIHMS1786113-supplement-319929_Uncut_Gel_Blots.pdf]
